# Supplementary material for: Chin brick tea inhibits obesity and nonalcoholic fatty liver disease in mice through inflammatory cytokine-related signaling pathways and entero-liver axis
Source: Research Square preprint supplement (doi:10.21203/rs.3.rs-6871240/v1), 2025-07-14
Supplement: Supplementary file 1 [file 580ddeb092355e86ffb7b010.docx]

Experimental drug/reagent comparison table

| Drugs / Reagents | Manufacturers | Item No. |
| --- | --- | --- |
| Glutathione Transaminase (GPT) Activity Assay Kit | Solarbio | BC1555 |
| Glutathione transaminase (GOT) activity assay kit | Solarbio | BC1565 |
| High-density lipoprotein cholesterol (HDL-C) assay kit | Nanjing Jiancheng Institute of Biological Engineering | A112-1-1 |
| Low-density lipoprotein cholesterol (LDL-C) assay kit | Nanjing Jiancheng Institute of Biological Engineering | A113-1-1 |
| Triglyceride (TG) assay kit | Nanjing Jiancheng Institute of Biological Engineering | A110-1-1 |
| Total Cholesterol (TC/TCH) Assay Kit | Nanjing Jiancheng Institute of Biological Engineering | A111-1-1 |
| Mouse IL-1β ELISA Assay Kit | Elabscience | E-EL-M0037c |
| Mouse IL-6 ELISA Assay Kit | Elabscience | E-EL-M0044c |
| Mouse IL-4 ELISA Assay Kit | Elabscience | E-EL-M0043c |
| PBS | Powder | Wuhan Kerry Biotechnology Co. |
| Protease inhibitors | Beijing Solexpo Technology Co. |  |
| 4% paraformaldehyde fixative | Wuhan Xavier Biotechnology Co. | G1101 |
| Physiological saline | Sichuan Keren Pharmaceutical Co. |  |
| 75% ethanol | Wuhan Xingheda Trading Co. |  |
| O.C.T. compound | SAKURA | 4583 |
| Saturated oil red O staining solution | Beijing Solexpo Technology Co. | G1260 |
| Hematoxylin dyeing solution | Beijing Solexpo Technology Co. | G1150 |
| Isopropyl alcohol | Sinopharm Group Chemical Reagent Co. |  |
| Glycerine gelatin sealer | Wuhan Xavier Biotechnology Co. | G1402 |
| High cholesterol model feed | Nantong TROPHY Feed Technology Co. |  |
| Chin brick tea aqueous extract [extraction rate of (10±5)%] | Hubei Changshengchuan Chin brick tea Research Institute |  |
| Imipenem/Cistatin Sodium (I8530-100mg) | Solarbio |  |
| Amoxicillin (A9320-5g) | Solarbio |  |
| Neomycin (N8090-10g) | Solarbio |  |
